# Supplementary material
Source: PubMed Central journal article supplement (PMC8843987)
Supplement: NIHMS1774797-supplement-2.pdf [file NIHMS1774797-supplement-2.pdf]

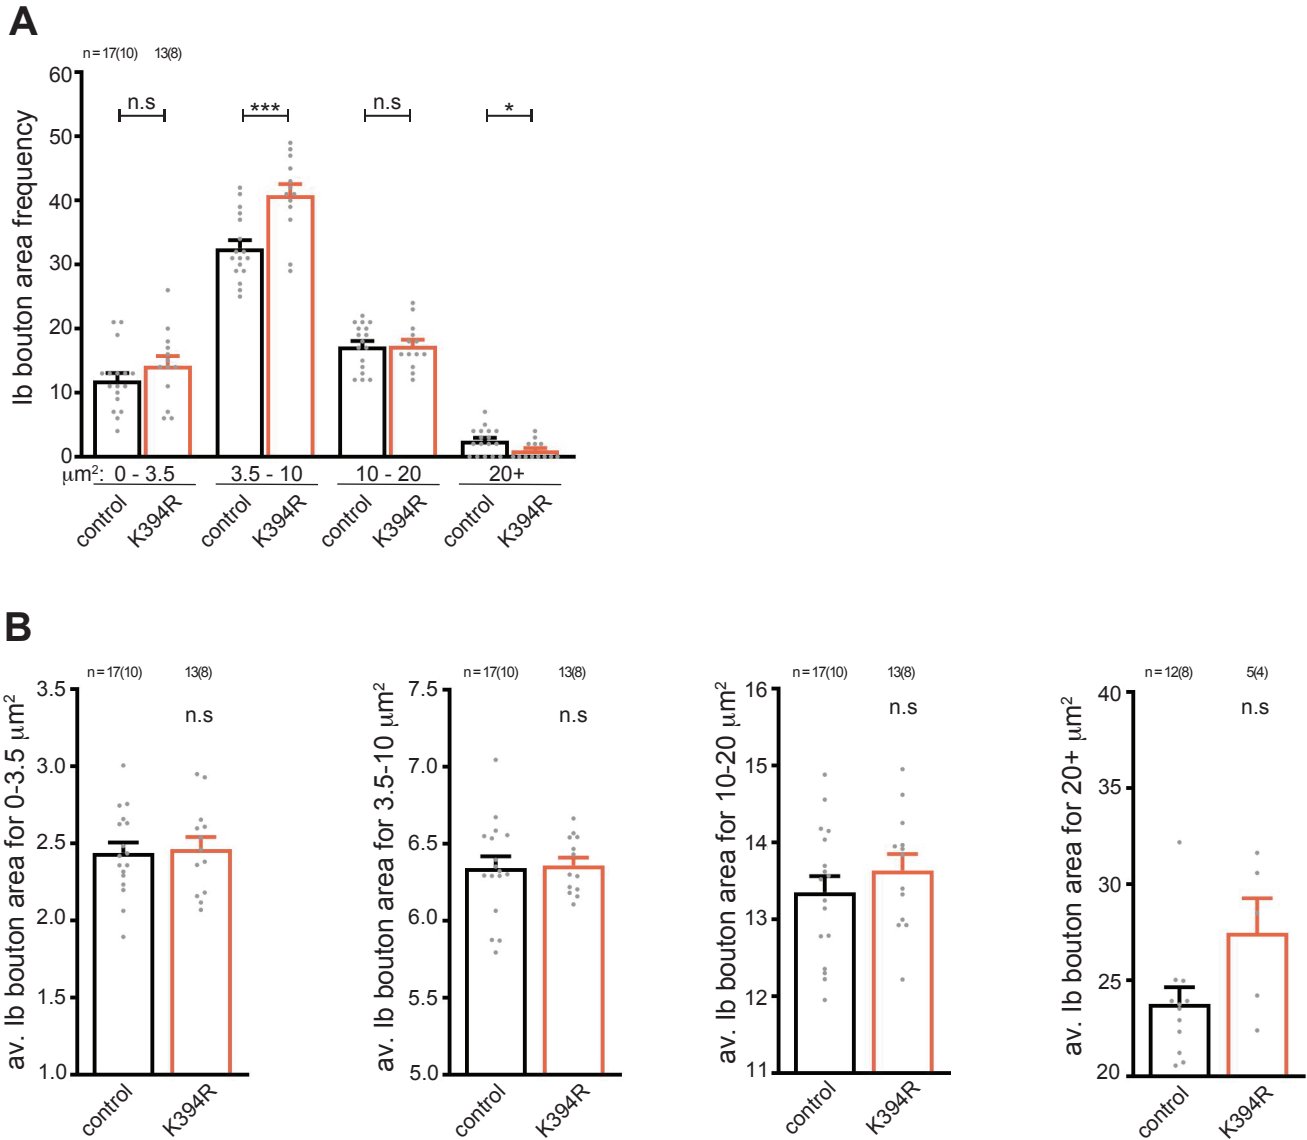

**Figure S1. Bouton size is not affected in the K394R mutants, related to Figure 1.**

(A and B) Distribution of bouton sizes (A) and average bouton sizes (B) in control and K394R mutants. In control larvae, most boutons have an area of 3.5-10  $\mu\text{m}^2$ , with an average bouton area of  $6.34 \pm 0.32 \mu\text{m}^2$ . K394R mutants have more boutons in the 3.5-10  $\mu\text{m}^2$  area category, reflective of the overall increase in bouton number in the mutants; however, the average area of these boutons is equivalent to controls ( $6.36 \pm 0.18 \mu\text{m}^2$ ). The number of boutons of other sizes and their areas are similar between controls and K394R mutants, although the number of infrequent "extra-large" boutons (>20  $\mu\text{m}^2$  area) decreases slightly. Overall, the average size of the boutons in K394R mutants is comparable to controls. p-values, distribution of bouton sizes: p=0.25, 0-3.5  $\mu\text{m}^2$  control v. K394R; p=0.000422, 3.5-10  $\mu\text{m}^2$  control v. K394R; p=0.96, 10-20  $\mu\text{m}^2$  control v. K394R; p=0.0363, >20  $\mu\text{m}^2$  control v. K394R (A). p-values, average bouton sizes: p=0.83, 0-3.5  $\mu\text{m}^2$  control v. K394R; p=0.86, 3.5-10  $\mu\text{m}^2$  control v. K394R; p=0.35, 10-20  $\mu\text{m}^2$  control v. K394R; p=0.054, >20  $\mu\text{m}^2$  control v. K394R (B).

Quantification: Student's unpaired t-test. All data are mean  $\pm$  SEM. n.s.=non-significant; \*p=0.01–0.05; \*\*\*p=0.001–0.0001.

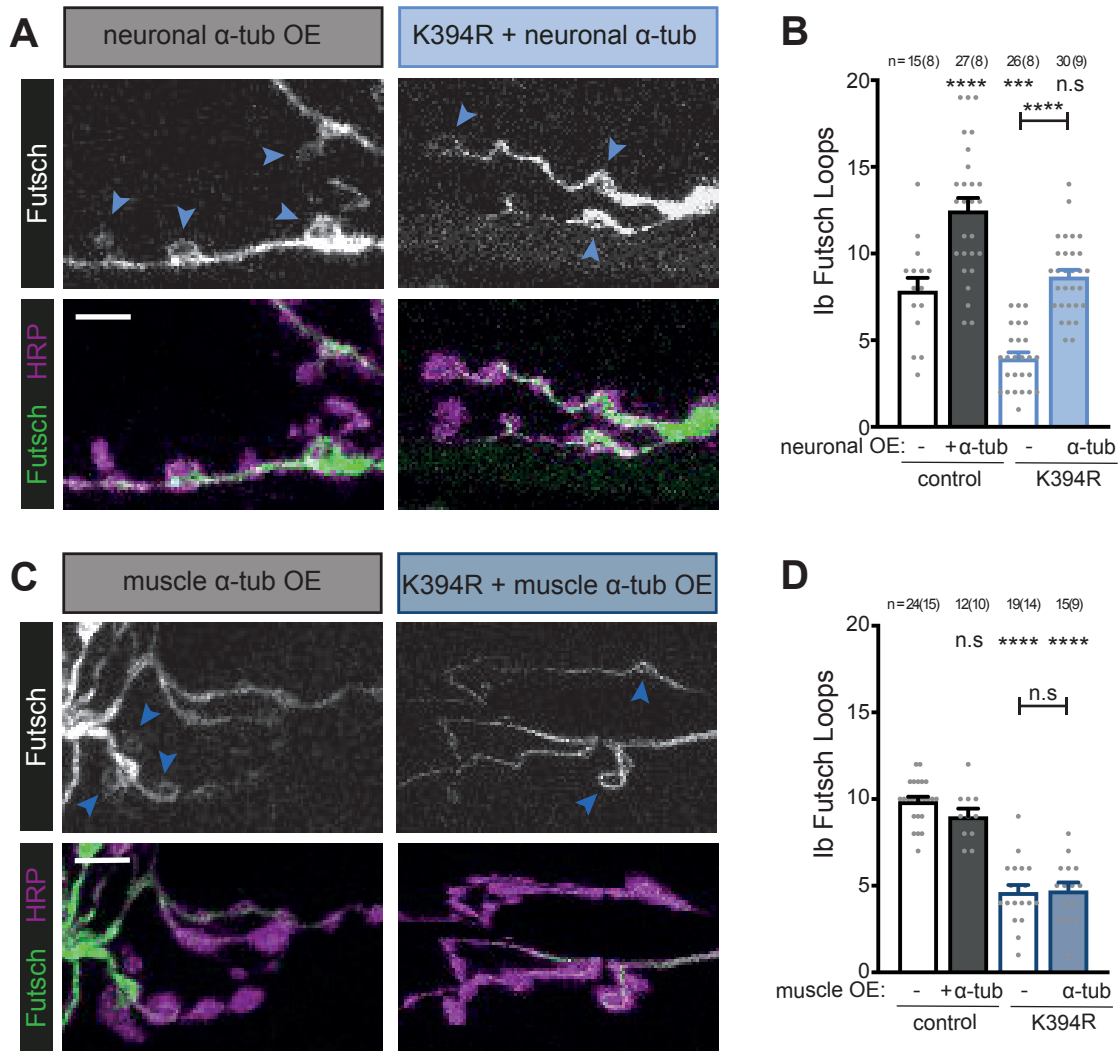

**Figure S2. Over-expression of wild-type  $\alpha$ -tubulin in neurons, but not muscles, rescues Futsch loops in K394R mutants, related to Figure 2.**

(A and B) Representative images (A) and quantification (B) of control and K394R mutants alone and with the over-expression of  $\alpha$ -tubulin in neurons. p-values, lb Futsch loops:  $p < 0.000001$ , control v. + $\alpha$ -tubulin;  $p = 0.0002$ , control v. K394R;  $p = 0.80$ , control v. K394R + $\alpha$ -tubulin;  $p < 0.000001$ , K394R v. K394R + $\alpha$ -tubulin (B).

(C and D) Representative images (C) and quantification (D) of control and K394R mutants with and without the over-expression of  $\alpha$ -tubulin in muscles. p-values, lb Futsch loops:  $p = 0.44$ , control v. + $\alpha$ -tubulin;  $p < 0.000001$ , control v. K394R;  $p < 0.000001$ , control v. K394R + $\alpha$ -tubulin;  $p = 0.998$ , K394R v. K394R + $\alpha$ -tubulin (D).

Quantification: One-way ANOVA with post-hoc Tukey. All data are mean  $\pm$  SEM. n.s= non-significant; \*\*\* $p = 0.01$ – $0.001$ ; \*\*\*\* $p < 0.0001$ .

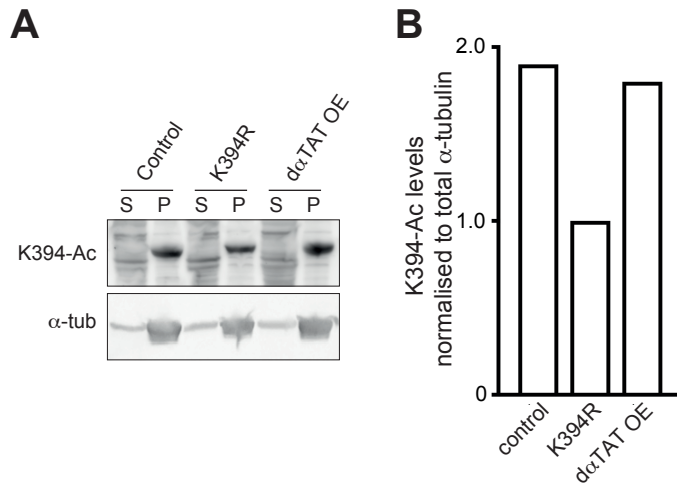

**Figure S3.  $\alpha$ -tubulin K394 acetylation is not regulated by d $\alpha$ TAT, related to Figure 6.**

(A and B) Western blot analysis (A) and quantification (B) of K394 acetylation of microtubules pelleted from control and K394R fly heads and fly heads over-expressing d TAT. elav-Gal4 was used to over-express one copy of UAS-d TAT. The anti-Ac-K394 signal in the tubulin pellet lane is normalised to total  $\alpha$ -tubulin. S=supernatant, P=pellet.

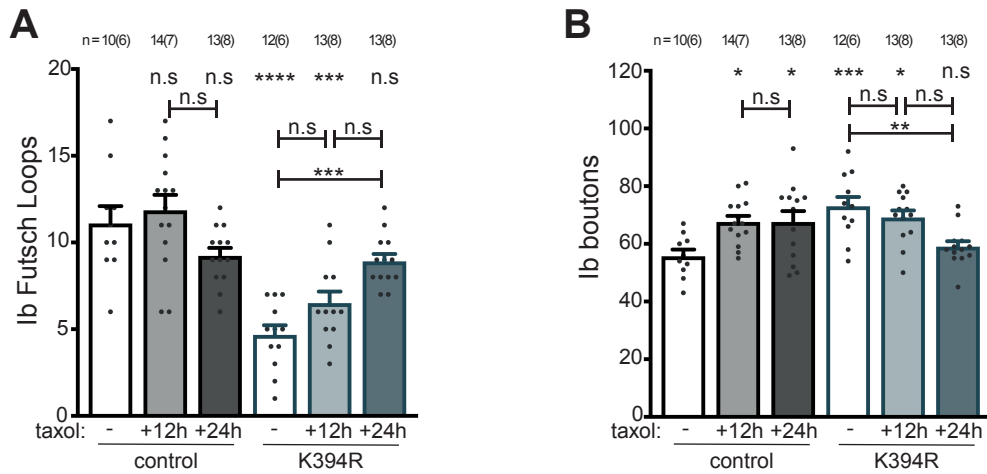

**Figure S4. Time-dependent effects of taxol on Futsch loops and bouton numbers in control and K394R mutant animals, related to the STAR Methods.**

(A and B) Quantification of Futsch loops (A) and boutons (B) in control and K394R mutant larvae incubated with taxol-free food (control) or food containing 10  $\mu$ M taxol for 12 or 24 hours before dissection. p-values, lb Futsch loops:  $p=0.97$ , control v. +12 h taxol;  $p=0.45$ , control v. +24 h taxol;  $p=0.066$ , +12 h taxol v. +24 h taxol;  $p<0.000001$ , control v. K394R;  $p=0.00046$ , control v. K394R +12 h taxol;  $p=0.27$ , control v. K394R +24 h taxol;  $p=0.44$ , K394R v. K394R +12 h taxol;  $p=0.00055$ , K394R v. K394R +24 h taxol;  $p=0.14$ , K394R +12 h taxol v. K394R +24 h taxol (A). p-values, lb boutons:  $p=0.040$ , control v. +12 h taxol;  $p=0.046$ , control v. +24 h taxol;  $p=0.99$ , +12 h taxol v. +24 h taxol;  $p=0.000902$ , control v. K394R;  $p=0.016019$ , control v. K394R +12 h taxol;  $p=0.96$ , control v. K394R +24 h taxol;  $p=0.91$ , K394R v. K394R +12 h taxol;  $p=0.0058$ , K394R v. K394R +24 h taxol;  $p=0.086$ , K394R +12 h taxol v. K394R +24 h taxol (B).

Quantification: One-way ANOVA with post-hoc Tukey. All data are mean  $\pm$  SEM. n.s.=non-significant; \* $p=0.01-0.05$ ; \*\* $p=0.01-0.001$ ; \*\*\* $p=0.01-0.001$ ; \*\*\*\* $p<0.0001$ .

| Primers used to generate <i>αTub84B</i> knock-in strains |                                                 |
|----------------------------------------------------------|-------------------------------------------------|
| K394A forward                                            | TCTGGACCACGCCTTCGATCTGATGTACGCCAAGCGTGCCTTCGTCC |
| K394A reverse                                            | CGGGCCCAGGCCTCGGCG                              |
| K394R forward                                            | CCCGTCTGGACCACAGGTTTCGATCTGATGTACGCC            |
| K394R reverse                                            | GGCGTACATCAGATCGAACCTGTGGTCCAGACGGG             |
| Primers used to generate pIHEU- <i>αTub84B</i>           |                                                 |
| <i>αTub84B</i> forward (EcoRI)                           | CGGCGCTCTGAACGTGGATCTGACTGAG                    |
| <i>αTub84B</i> reverse (XbaI)                            | TCAAAGCGGAGAGAGGCGGTAATCGAG                     |
| Primers used to generate pBSK-U63-EB1-gRNA               |                                                 |
| EB1 guide forward                                        | CGTCCTCTGGGTTTTAGAGCTAGAAATAGC                  |
| EB1 guide reverse                                        | AGGAGTATTACGACGTTAAATTGAAAATAGGTC               |

**Table S1. Oligonucleotide primers used in this study, related to STAR Methods.**
